# Supplementary material for: Emulsion fabrication of magnetic mesoporous carbonated hydroxyapatite microspheres for treatment of bone infection
Source: Royal Society of Chemistry journal article supplement (doi:10.1039/c3ra45896b), 2014-01-01
Supplement: c3ra45896b.pdf [file c3ra45896b.pdf]

Electronic Supplementary Information (ESI)

**Emulsion Fabrication of Magnetic Mesoporous Carbonated Hydroxyapatite  
Microspheres for Treatment of Bone Infection**

**Teng Long,<sup>†a</sup> Ya-Ping Guo,<sup>†\*b</sup>, Sha Tang<sup>b</sup>, Ya-Jun Guo<sup>b</sup>, Zhen-An Zhu<sup>\*a</sup>**

<sup>a</sup> Shanghai Key Laboratory of Orthopedic Implant, Department of Orthopedic Surgery, Shanghai Ninth People's Hospital, Shanghai Jiao Tong University School of Medicine, Shanghai 200011, China. E-mail: zhuzhenan2006@126.com (Z. A. Zhu)

<sup>b</sup> The Education Ministry Key Lab of Resource Chemistry and Shanghai Key Laboratory of Rare Earth Functional Materials, Shanghai Normal University, Shanghai 200234, P. R. China. Fax: +86-21-64321951; Tel: +86-21-64321951; E-mail: ypguo@shnu.edu.cn (Y. P. Guo)

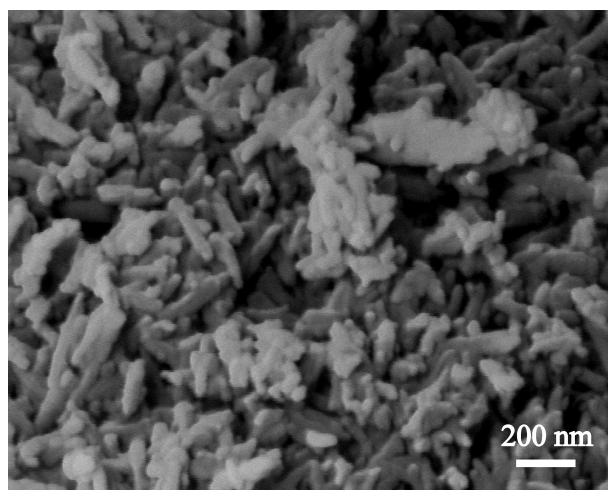

Figure. S1. SEM image of HAPs.

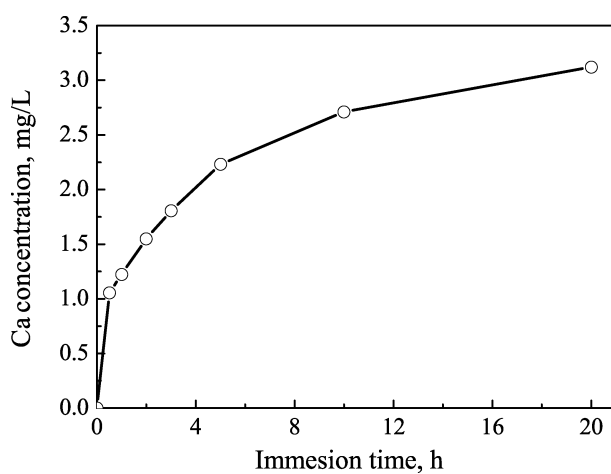

Figure S2. The in vitro Ca release profiles of MEHMs in PBS solution
